# Supplementary material
Source: PubMed Central journal article supplement (PMC1464277)

## Supplementary Figure 1

A) PTGS-1

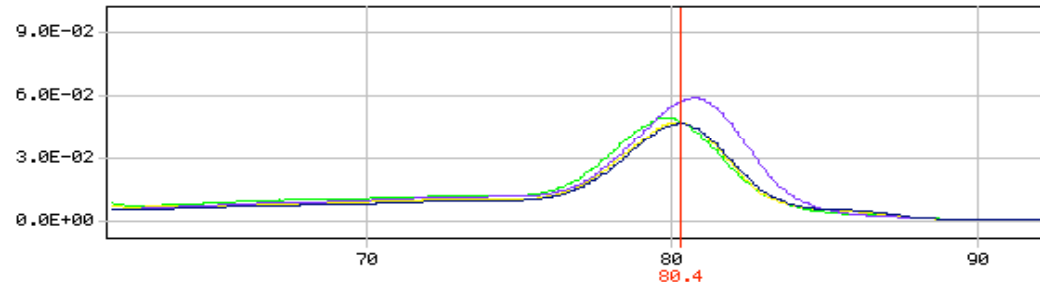

B) PTGS-2

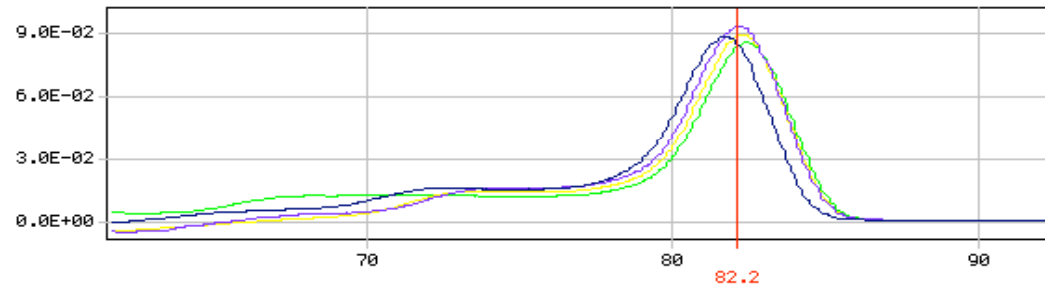

C) GAPDH

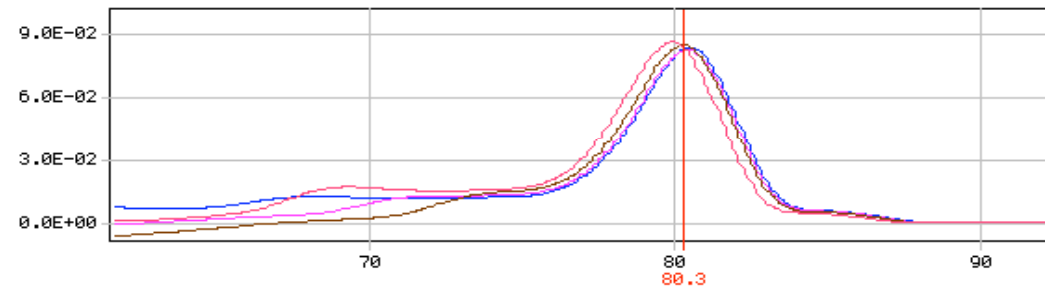

## Supplementary Figure 2

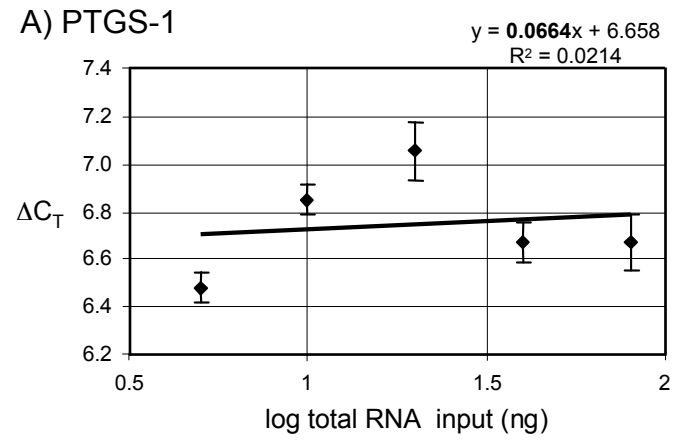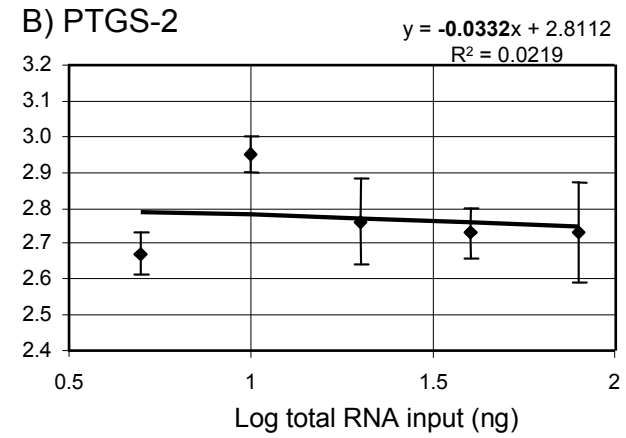

### Supplementary Figure 3

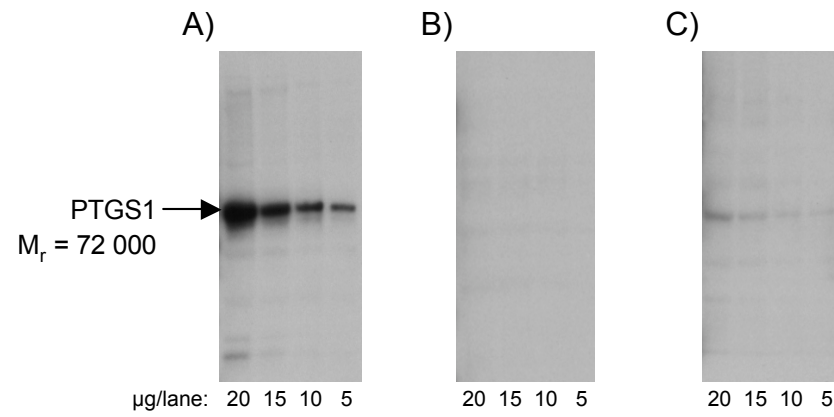

### Supplementary Figure 4

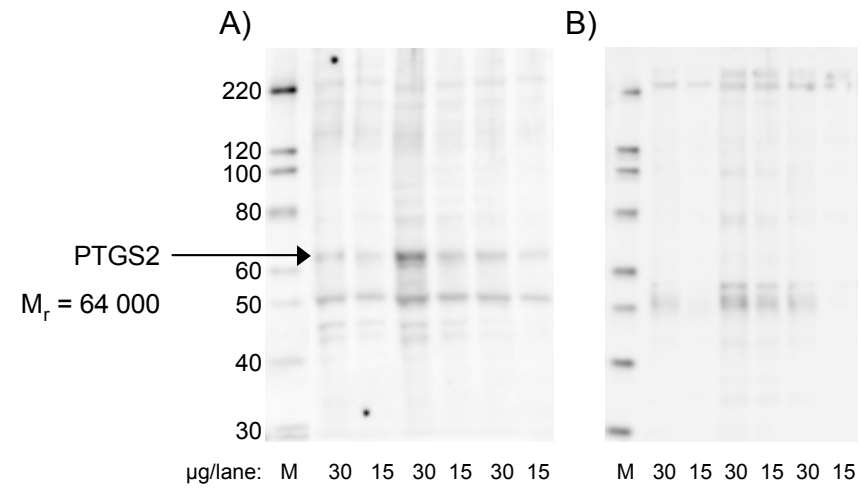

Supplement: jphysiol_2005.098129_1.pdf [file jphysiol_2005.098129_1.pdf]
